**Domestication effects on immune response: comparison of cell-mediated immune competence in wild and domesticated Bengalese finch**

Running title: Effects of domestication on immunity

Kenta Suzuki<sup>a,c\*</sup>, Kazuo Okanoya<sup>b,c</sup>

<sup>a</sup> *Faculty of Health Sciences, Nihon Institute of Medical Science, Moroyama-machi 350-0435, JAPAN*

<sup>b</sup> *Department of Life Sciences, Graduate School of Arts and Sciences, the University of Tokyo, Meguro-ku, Tokyo 153-8902, JAPAN*

<sup>c</sup> *Cognition and Behavior Joint Research Laboratory, RIKEN Center for Brain Science, Wako, Saitama 351-0198, JAPAN*

\*Corresponding author: Faculty of Health Sciences, Nihon Institute of Medical Science, 1276

Shimogawara, Moroyama-machi, Iruma-gun, Saitama 350-0435, JAPAN. Tel.: +81-49-294-9000, Fax: +81-49-294-9009.

E-mail address: kentszk@gmail.com (K. Suzuki).

## 19     **ABSTRACT**

20             Domesticated Bengalese finch (*Lonchura striata* var. *domestica*) lack natural selection pressures

21     and consequently have more complex songs and altered behavioural and psychological traits when

22     compared to their wild ancestor, the white-rumped munia (*Lonchura striata*). Clarifying the sexual traits

23     and life history trade-offs in Bengal finches will be help to improve our understanding of the evolution of

24     complex songs and domesticated traits. Here, we have assessed the immune competence of the Bengalese

25     finch and the white-rumped munia using phytohemagglutinin (PHA) tests to create an index of

26     cell-mediated immune responses. We found that the Bengalese finch had a significantly larger

27     immunocompetence than the white-rumped munia, indicating that they devote more resources to both

28     immunity and reproduction. Thus, there is no trade-off but a positive relationship between

29     immunocompetence and reproductive traits, which may be related to the release from natural selection

30     pressures. These results will be useful in understanding the mechanisms by which domestication-induced

31     changes due to a lack of natural selection pressure affect behavioural and physiological changes.

32

33     **Keywords:** Bengalese finch; cell-mediated immune competence; immunity; phytohemagglutinin test;

34     domestication

35

## 36 1. Introduction

37 The Bengalese finch (*Lonchura striata* var. *domestica*) is a domesticated strain of the wild  
38 strains, white-rumped munia (*Lonchura striata*) (Washio, 1996; Okanoya 2004a, b). It evolved  
39 phonologically and syntactically complex songs, which are considered sexual traits (Honda and Okanoya,  
40 1999; Okanoya 2004a, b). Domestication processes have also altered the physiological and behavioural  
41 traits of the Bengalese finch. The white-rumped munia have traits that are advantageous for survival in the  
42 wild, such as higher fear reactivity, aggression, and corticosterone levels, when compared with the  
43 Bengalese finch (Suzuki et al., 2012; 2013; 2014a, b, and unpublished data). It is likely that the latter has  
44 developed reproductive traits, rather than the traits that are advantageous in the wild due to the release  
45 from natural selection pressures and the presence of artificial selection. Incidentally, the song traits of the  
46 Bengalese finch have never been artificially selected by humans (Washio, 1996).

47 There are several possible hypotheses for the relationship between the evolution of sexual traits  
48 and life history trade-offs in the Bengalese finch. First, in the wild environment, high immunocompetence  
49 must be maintained to protect against the high risk of infection but in the domesticated strains, there is no  
50 risk in the rearing environment, so the cost to immunity may be reduced and sexual traits can be developed.  
51 Selected lines of domestic fowl (*Gallus gallus domesticus*) with different immunoresponsiveness levels  
52 showed that a high response line had a smaller comb size as a sexual ornament (Verhulst et al., 1999). Thus,  
53 there appears to be a negative correlation between immunocompetence and sexual traits. Second, the  
54 immunocompetence handicap hypothesis (ICHH) should be considered (Folstad & Karter, 1992). It is  
55 known that testosterone develops sexual traits and suppresses immunocompetence. Males that have

56 developed sexual traits and survive without pathogen infections are superior with high immunocompetence.  
 57 Therefore, sexual traits are considered an indicator of high immunocompetence. For example, there is  
 58 evidence that male house finches (*Carpodacus mexicanus*) that survived an epidemic had significantly  
 59 redder plumage, a sexual trait, than the males that did not survive (Nolan et al., 1998). Third, the  
 60 developmental stress hypothesis suggests that song complexity is related to stress conditions during  
 61 development (Buchanan et al., 2003), and since stress lowers immunocompetence and sexual traits, males  
 62 with lower stress levels may be able to maintain higher immunocompetence and develop complex song  
 63 traits as attractive sexual traits.

64 By comparing the immunity of Bengalese finch and white-rumped munia, it is thought that the  
 65 evolutionary mechanisms of the domesticated traits (i.e., complex song evolution) may be better  
 66 understood. Therefore, the present study aimed to compare the immune competence between domesticated  
 67 Bengalese finches and their wild ancestor, the white-rumped munia. Phytohemagglutinin (PHA) tests were  
 68 performed to index the cell-mediated immune responses. The PHA test is practical and reliably measures  
 69 immunocompetence as acquired T-cell mediated immunocompetence (Tella et al., 2008).

70

## 71 **2. Method**

### 72 **2. 1. Subjects and husbandry**

73 Thirty-six adult Bengalese finches (*Lonchura striata* var. *domestica*, 19 males and 17 females)  
 74 and 38 adult white-rumped munia (*Lonchura striata*, 18 males and 20 females) were used for the  
 75 experiment. The Bengalese finches were bred in our laboratory. White-rumped munias were bought from a

commercial supplier (n = 12), captured in the wild in Taiwan (n = 3), or bred in our laboratory (n = 23). The birds were housed in groups of four (each species and sex) in the same type of stainless-steel cages (cage size: 370 mm × 415 mm × 440 mm, equipped with two wooden perches) in a common room at RIKEN Brain Science Institute (BSI) with a 13-/11-h light/dark cycle; the birds were supplied food and water. The ambient room temperature was approximately 25 °C with 50% humidity. Seed mixture, shell grit, and vitamin-enhanced water were available *ad libitum*. All experimental procedures and the housing conditions of the birds were approved by the Animal Experiments Committee at RIKEN (#H24-2-229), and all of the birds were cared for in accordance with the Institutional Guidelines for Experiments Using Animals.

85

## 2. 2. PHA test

Phytohemagglutinin (PHA) responses (wing-web swelling test) are commonly used to assess cell-mediated immune competence in passerine birds, as it is a T-cell stimulant (Martin et al., 2006; Tella et al., 2008). Before the injection, we cleaned the left-wing web of the birds with an alcohol swab, and measured its thickness four times using a digital spessimeter (Mitsutoyo, Kanagawa, Japan) to the nearest 0.001 mm. Then, 0.03 mL of 5 mg/mL solution of PHA-P (Cat. L8754, Sigma Chemical Co., St Louis, MO, USA) was dissolved in phosphate-buffered saline (1 × PBS) and injected into the left-wing-web (patagium) using a 27-gauge needle. Four measurements of the wing web thickness at the injected point were taken after 24 h. The mean of these measured values was used for the analysis. The PHA index (PHA response) was calculated as the difference between the post injection and the pre-injection values for the

96 wing-web thickness.

97

98 2. 3. Statistical analysis

99 The PHA indexes of the Bengalese finch and white-rumped munias were analysed using

100 two-way analysis of variance (ANOVA, factors: strain and sex). Comparison of the PHA indices in the

101 three groups of white-rumped munias, under different rearing conditions (bred, bought, and captured

102 individuals), were also assessed using ANOVA. Statistical analyses were performed using Stat View

103 software (version 5, SAS Institute Inc., Cary, NC, USA). Values of  $p < 0.05$  were considered significant.

104

### 105 3. Results

106 The PHA index (Fig. 1) showed that there were significant main effects for the strain [ $F(1, 70) =$

107  $37.52, p < 0.0001$ ], but no significant main effects for sex [ $F(1, 70) = 1.398 \times 10^{-6}, p = 0.999$ ] or

108 interactions between strain and sex [ $F(1, 70) = 3.733, p = 0.06$ ]. The PHA index was significantly higher

109 in the Bengalese finches [mean = 0.846, standard error of mean (SEM) = 0.039] than in the white-rumped

110 munias (mean = 0.557, SEM = 0.029). We found no significant differences in the PHA indexes between the

111 different rearing conditions (bred, bought, and captured individuals) for the white-rumped munias [ $F(2,$

112  $35) = 0.188, p = 0.830$ ].

113

### 114 4. Discussion

115 The PHA test was used to compare the immune capacities of the domesticated Bengalese finch

and its wild ancestor, the white-rumped munia, and found that the former had a significantly larger immunocompetence than the latter. The results showed that the immune capacity and sexual traits were both higher in the domesticated Bengalese finch than the wild strain. An investigation of zebra finches (*Taeniopygia guttata*), also found that the domestic birds had a stronger PHA response than the wild birds (Tschirren et al., 2009). Furthermore, the domestication process also seemed to improve the immune status of fish, as F4 tamed Eurasian perch juveniles displayed higher immune capacities than the F1 (*Perca fluviatilis*; Douxfils et al., 2011). These results indicate that domestication enhances immunity in a variety of species. The laboratory-bred Bengal finches and white-rumped munia were raised under the same rearing conditions and had similar durations and levels of human contact. The results of this study did not show any differences in the PHA responses among the different rearing conditions (bred, bought, and captured individuals) used for the white-rumped munias. Therefore, it is suggested that the PHA of the Bengalese finches was higher due to domestication, irrespective of the differences in their rearing conditions.

The domesticated Bengalese finches exhibit a high-level immune response and complex song traits compared with the wild birds. Therefore, there does not appear to be a trade-off between immune capacity and sexual traits. Testosterone is known to develop sexual characteristics and suppress the immune system. According to the immunocompetence handicap hypothesis (ICHH), sexual traits are considered an indicator of high immunocompetence because males that have developed sexual traits and survive without pathogen infections are superior with high immunocompetence (Folstad & Karter, 1992). It is possible that the Bengalese finch could maintain a highly competent immune system even with the use

of high testosterone level in the development of its complex song trait as there is no pressure of natural selection. However, there is preliminary data showing that there is no difference in the testosterone levels between Bengal finches and white-rumped munias (Tobari et al., 2019). Therefore, the immunocompetence handicap hypothesis (ICHH) does not seem to apply. Finally, the stress level (faecal corticosterone concentration) during the developmental periods was lower in the Bengalese finch than in the white-rumped munias (Suzuki et al., 2014a, b), and this resulted in improved development of immunocompetence and sexual traits. Previous studies into the repertoire size and song bout durations of European starlings (*Sturnus vulgaris*) showed that developmental stress decreases song complexity, and there was also a positive relationship with song traits and immune response (PHA response; Buchanan et al., 2003; Spencer et al., 2004). This study suggests that the results are consistent with the developmental stress hypothesis (Buchanan et al., 2003).

The mechanisms by which domestication alters the immune responses are not clear. Differences in allele frequencies for the major histocompatibility complex (MHC), whose molecules play a crucial role in adaptive immune responses, have been identified between wild zebra finch subspecies and domesticated populations, which may indicate immune adaptations to pathogen pressures (Newhouse and Balakrishnan, 2015). However, further research is required to determine whether these changes actually affect the differences in immune capacity.

It is possible that corticosterone will affect immunocompetence. Faecal corticosterone levels were previously found to be lower in Bengal finches than in wild strains (Suzuki et al., 2012), despite their higher PHA responses. Butler et al. (2010) reported that there was a negative relationship between



corticosterone and PHA responses in sham-implanted American kestrel (*Falco sparverius*) nestlings. Birds that naturally maintain higher levels of circulating corticosterone may also have reduced levels of cutaneous immune function (Butler et al., 2010). Moreover, house sparrow (*Passer domesticus*) nestlings injected with corticosterone showed a weaker immune response (PHA response) than the controls (Loiseau et al., 2008). There are also reports that corticosterone has an immunosuppressive effect (Buchanan 2000). Bengalese finch may maintain high immune capacities as corticosterone levels decrease due to domestication.

Zebra finch studies that used a selection line with peak corticosterone levels for the stress responses, found that peak corticosterone titers had a positive effect on the PHA response. The selection line with high peak corticosterone levels had a higher PHA response (Roberts et al., 2007). In the American kestrel study, corticosterone-treated nestlings showed an increased amount of swelling (immunoresponsiveness) after the increase in corticosterone exposure had ended, when compared with that in the controls (Butler et al., 2010). The seemingly different effects of corticosterone on immunity (immunostimulatory or immunosuppressive) may be due to the differences in low-level or high-level and acute or chronic responses, and differences in the effects of the two types of corticosterone receptors: mineralocorticoid and glucocorticoid. Low-levels of corticosterone may enhance immunocompetence after hormone exposure, while chronically elevated corticosterone has immunosuppressive effects (Butler et al., 2010).

In summary, these results indicate that domesticated Bengal finches have a higher response to PHA than their wild ancestors, the white-rumped munias do. This suggests that the domestication of

Bengal finches allowed them to devote more resources to both immunity and reproduction. Thus, there is no trade-off but a positive relationship between immunity and reproductive traits, which may be related to the release from natural selection pressures and the decrease in stress hormones due to domestication. These results will be useful in understanding the mechanisms by which domestication-induced changes in selection pressure affect behavioural and physiological changes, leading to the formation of domestication traits (domestic syndromes). The details of these mechanisms however need to be further investigated in the future.

## Acknowledgements

We thank Dr. Yuko Ikkatai and Ms. Keiko Asai (RIKEN Brain Science Institute, Tokyo, Japan) for animal care. This study was supported by JST-ERATO and RIKEN Brain Science Institute.

## Funding

This research receives grants from JSPS KAKENHI (15K14581, 17H06380, 20H00105) to KO.

## References

- Buchanan, K. L. (2000). Stress and the evolution of condition-dependent signals. *Trends in Ecology & Evolution*, 15(4), 156-160. [https://doi.org/10.1016/S0169-5347\(99\)01812-1](https://doi.org/10.1016/S0169-5347(99)01812-1).
- Buchanan, K. L., Spencer, K. A., Goldsmith, A. R., & Catchpole, C. K. (2003). Song as an honest signal of

196 past developmental stress in the European starling (*Sturnus vulgaris*). Proceedings of the Royal Society of  
197 London. Series B: Biological Sciences, 270(1520), 1149-1156. <https://doi.org/10.1098/rspb.2003.2330>.  
198  
199 Butler, M. W., Leppert, L. L., & Dufty Jr, A. M. (2010). Effects of small increases in corticosterone levels  
200 on morphology, immune function, and feather development. Physiological and Biochemical Zoology,  
201 83(1), 78-86. <https://doi.org/10.1086/648483>.  
202  
203 Douxfils, J., Mandiki, S. N. M., Marotte, G., Wang, N., Silvestre, F., Milla, S., Henrotte, E., Vandecan, M.,  
204 Rougeot, C., Mélard, C., & Kestemont, P. (2011). Does domestication process affect stress response in  
205 juvenile Eurasian perch *Perca fluviatilis*?. Comparative Biochemistry and Physiology Part A: Molecular &  
206 Integrative Physiology, 159(1), 92-99. <https://doi.org/10.1016/j.cbpa.2011.01.021>.  
207  
208 Folstad, I., & Karter, A. J. (1992). Parasites, bright males, and the immunocompetence handicap. The  
209 American Naturalist, 139(3), 603-622. <https://doi.org/10.1086/285346>.  
210  
211 Honda, E., & Okanoya, K. (1999). Acoustical and syntactical comparisons between songs of the  
212 white-backed munia (*Lonchura striata*) and its domesticated strain, the Bengalese finch (*Lonchura striata*  
213 var. *domestica*). Zoological Science, 16(2), 319-326. <https://doi.org/10.2108/zsj.16.319>.  
214  
215 Martin, L. B., Han, P., Lewittes, J., Kuhlman, J. R., Klasing, K. C., & Wikelski, M. (2006).

216 Phytohemagglutinin-induced skin swelling in birds: histological support for a classic immunoecological  
 217 technique. *Functional Ecology*, 20(2), 290-299. <https://doi.org/10.1111/j.1365-2435.2006.01094.x>.  
 218  
 219 Newhouse, D. J., & Balakrishnan, C. N. (2015). High major histocompatibility complex class I  
 220 polymorphism despite bottlenecks in wild and domesticated populations of the zebra finch (*Taeniopygia*  
 221 *guttata*). *BMC evolutionary biology*, 15(1), 1-11.  
 222  
 223 Nolan, P. M., Hill, G. E., & Stoehr, A. M. (1998). Sex, size, and plumage redness predict house finch  
 224 survival in an epidemic. *Proceedings of the Royal Society of London. Series B: Biological*  
 225 *Sciences*, 265(1400), 961-965. <https://doi.org/10.1098/rspb.1998.0384>.  
 226  
 227 Okanoya, K. (2004a). Song syntax in Bengalese finches: proximate and ultimate analyses. *Advances in the*  
 228 *Study of Behavior*, 34, 297-346. [https://doi.org/10.1016/S0065-3454\(04\)34008-8](https://doi.org/10.1016/S0065-3454(04)34008-8).  
 229  
 230 Okanoya, K. (2004b). The Bengalese finch: a window on the behavioral neurobiology of birdsong syntax.  
 231 *Annals of the New York Academy of Sciences*, 1016(1), 724-735. <https://doi.org/10.1196/annals.1298.026>.  
 232  
 233 Roberts, M. L., Buchanan, K. L., Hasselquist, D., & Evans, M. R. (2007). Effects of testosterone and  
 234 corticosterone on immunocompetence in the zebra finch. *Hormones and behavior*, 51(1), 126-134.  
 235 <https://doi.org/10.1016/j.yhbeh.2006.09.004>.

236

237 Spencer, K. A., Buchanan, K. L., Goldsmith, A. R., & Catchpole, C. K. (2004). Developmental stress,  
238 social rank and song complexity in the European starling (*Sturnus vulgaris*). Proceedings of the Royal  
239 Society of London. Series B: Biological Sciences, 271(suppl\_3), S121-S123.  
240 <https://doi.org/10.1098/rsbl.2003.0122>.

241

242 Suzuki, K., Ikebuchi, M., Bischof, H. J., & Okanoya, K. (2014a). Behavioral and neural trade-offs between  
243 song complexity and stress reaction in a wild and a domesticated finch strain. Neuroscience &  
244 Biobehavioral Reviews, 46, 547-556. <https://doi.org/10.1016/j.neubiorev.2014.07.011>.

245

246 Suzuki, K., Ikebuchi, M., & Okanoya, K. (2013). The impact of domestication on fearfulness: a  
247 comparison of tonic immobility reactions in wild and domesticated finches. Behavioural processes, 100,  
248 58-63. <https://doi.org/10.1016/j.beproc.2013.08.004>.

249

250 Suzuki, K., Matsunaga, E., Yamada, H., Kobayashi, T., & Okanoya, K. (2014b). Complex song  
251 development and stress hormone levels in the Bengalese finch. Avian Biology Research, 7(1), 10-17.  
252 <https://doi.org/10.3184/175815514X13903270812502>.

253

254 Suzuki, K., Yamada, H., Kobayashi, T., & Okanoya, K. (2012). Decreased fecal corticosterone levels due  
255 to domestication: A comparison between the white-backed munia (*Lonchura striata*) and its domesticated

256 strain, the Bengalese finch (*Lonchura striata* var. *domestica*) with a suggestion for complex song evolution.

257 Journal of Experimental Zoology Part A: Ecological Genetics and Physiology, 317(9), 561-570.

258 <https://doi.org/10.1002/jez.1748>.

259

260 Tella, J. L., Lemus, J. A., Carrete, M., & Blanco, G. (2008). The PHA test reflects acquired T-cell mediated

261 immunocompetence in birds. Plos one, 3(9), e3295. <https://doi.org/10.1371/journal.pone.0049617>.

262

263 Tobari, Y., Okanoya, K., Suzuki, K. (2019). Domestication and endocrine changes in songbirds:

264 Hormone functions for forming socials. The CELL, 51, 64-67. Hokuryukan, Tokyo. (in Japanese)

265

266 Tschirren, B., Rutstein, A. N., Postma, E., Mariette, M., & Griffith, S. C. (2009). Short□ and long□ term

267 consequences of early developmental conditions: a case study on wild and domesticated zebra finches.

268 Journal of evolutionary biology, 22(2), 387-395. <https://doi.org/10.1111/j.1420-9101.2008.01656.x>.

269

270 Verhulst, S., Dieleman, S. J., & Parmentier, H. K. (1999). A tradeoff between immunocompetence and

271 sexual ornamentation in domestic fowl. Proceedings of the National Academy of Sciences, 96(8),

272 4478-4481. <https://doi.org/10.1073/pnas.96.8.4478>.

273

274 Washio, K., 1996. Chasing the mystery of the Bengalese finch. Modern Literature Inc., Tokyo. (in

275 Japanese)

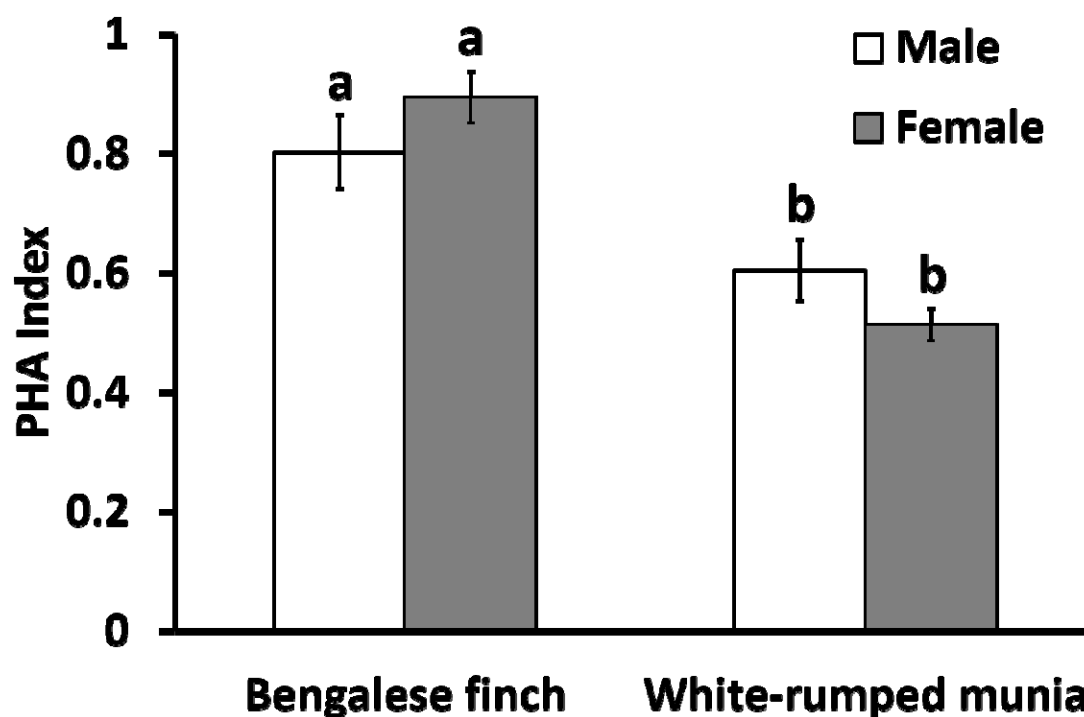

Fig. 1. Phytohemagglutinin (PHA) index in Bengalese finches (n = 36) and white-rumped munias (n = 38).

Bars are means, and vertical lines are standard error of mean (SEM). Open bars represent male birds, and closed bars represent female birds. Different letters indicate significant differences. The PHA indexes of the Bengalese finch and white-rumped munias were analysed using two-way analysis of variance (ANOVA, factors: strain and sex). Differences were found in the PHA index between Bengalese finches and white-rumped munias ( $P < 0.0001$ ). No sex differences ( $P > 0.05$ ) were observed in the PHA indexes.
